# Supplementary material for: A novel porous MgO sorbent fabricated through carbon insertion
Source: Royal Society of Chemistry journal article supplement (doi:10.1039/c4ta01188k), 2014-01-01
Supplement: c4ta01188k1.pdf [file c4ta01188k1.pdf]

## Supporting Information

### Novel porous MgO sorbent fabricated through carbon-insertion

Yan Yan Li, Mi Mi Wan, Wei Gang Lin, Ying Wang, Jian Hua Zhu\*

Table 1. XPS data of carbonized magnesium salts.

| Samples | Atomic Concentration/% |      |      |      |
|---------|------------------------|------|------|------|
|         | C1S                    | O1S  | Mg1S | C/Mg |
| MA-1    | 34.8                   | 40.1 | 25.1 | 1.4  |
| MA-2    | 37.3                   | 45.7 | 17.0 | 2.2  |
| MA-3    | 43.6                   | 44.5 | 11.9 | 3.7  |
| MA-4    | 41.9                   | 45.7 | 12.4 | 3.4  |
| MA-5    | 44.8                   | 44.4 | 10.8 | 4.1  |
| MA-6    | 40.4                   | 45.8 | 13.9 | 2.9  |
| MN      | 37.7                   | 47.4 | 14.9 | 2.5  |

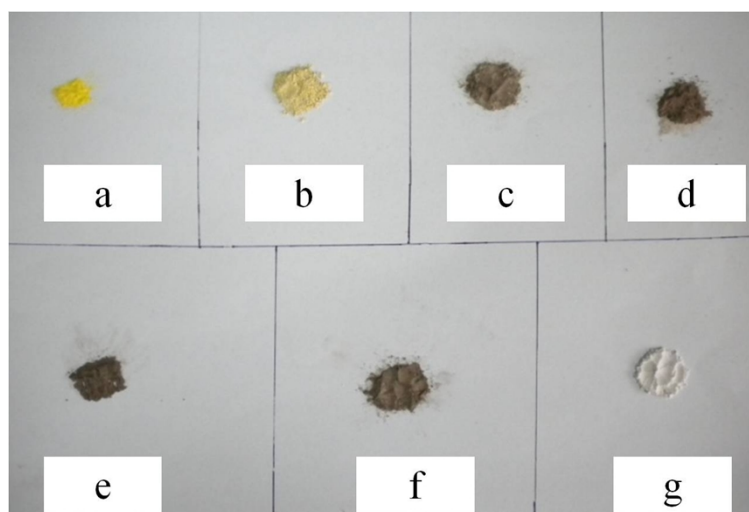

Fig. S1 Images of (a) MA-1, (b) MA-2, (c) MA-3, (d) MA-4, (e) MA-5, (f) MA-6 and (g) MN samples.

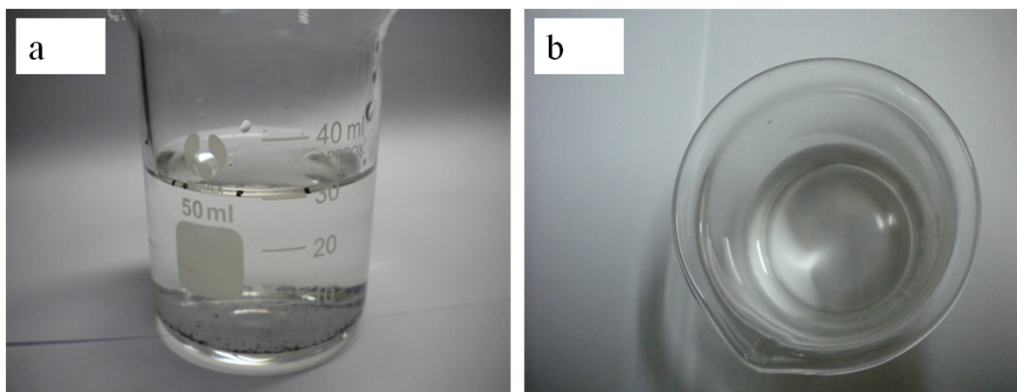

**Fig. S2.** Final appearances of (a) MA-5 and (b) MN dissolved into 0.02M HCl.

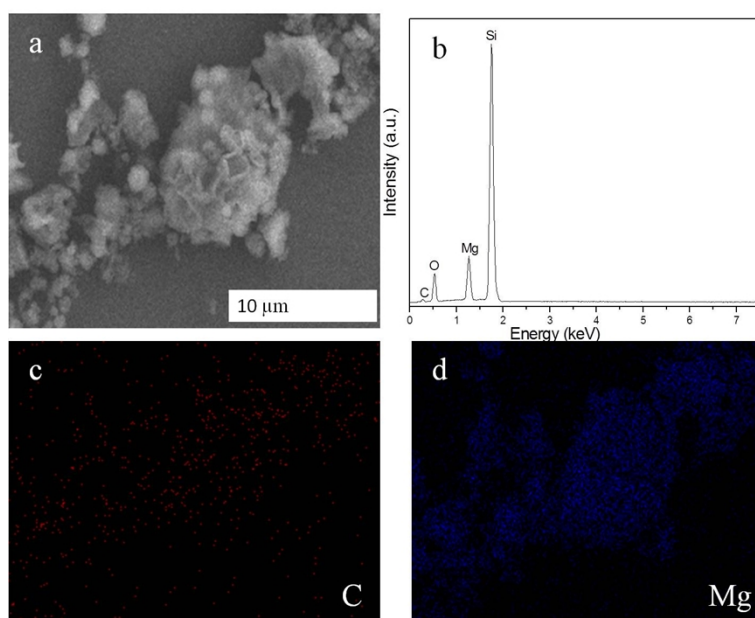

**Fig. S3** (a) SEM images, (b) EDX spectrum, and (c, d) x-ray mapping of MA-1 sample, in which the magnification is 5000.

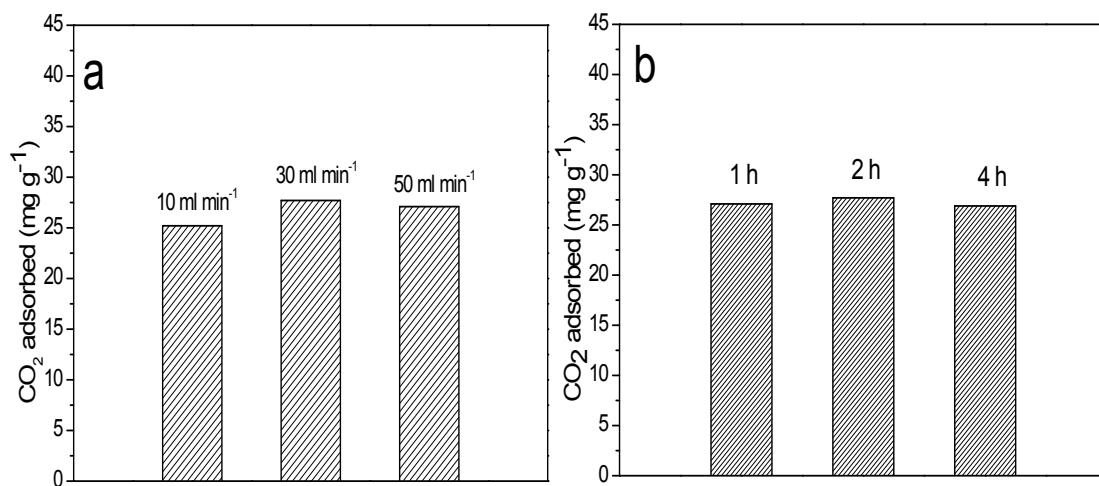

**Fig. S4.** Influences of N<sub>2</sub> flow (a) and carbonization time (b) on the CO<sub>2</sub> adsorption at 473 K by MA-5 composite.

(a) Carbonization time is 2 h. (b) N<sub>2</sub> flow is 30 ml min<sup>-1</sup>.

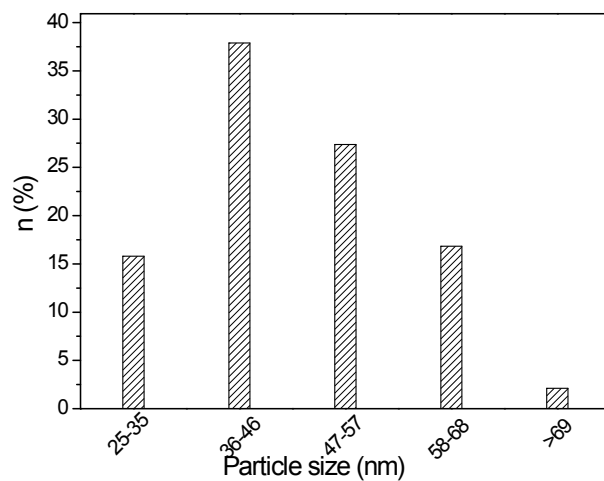

**Fig. S5** The particle size distribution of MA-5-s sample.
